# Supplementary material for: Nutritive and Phytochemical Composition of Aromatic Microgreen Herbs and Spices Belonging to the Apiaceae Family
Source: MDPI journal article supplement (doi:10.3390/plants11223057), 2022-11-11
Supplement: s1 [file s1]

**Table S1.** Limit of detection (LOD), limit of quantification (LOQ), linearity of calibration curves, recovery percentage (%) and intra- and inter-day precision of the Ultra High Pressure Liquid Chromatograph used for phenolic compounds detection.

| COMPOUNDS               | LOD   | LOQ  | Linearity      | Recovery (%) |               |               | Intra-Day Precision (RSD, %; n=3) | Inter-Day Precision (RSD, %; n=3) |
|-------------------------|-------|------|----------------|--------------|---------------|---------------|-----------------------------------|-----------------------------------|
|                         | ng/g  |      | r <sup>2</sup> | 1<br>(mg/kg) | 10<br>(mg/kg) | 50<br>(mg/kg) |                                   | 1 mg/kg                           |
| salicylic acid hexoside | 0.060 | 0.18 | 0.991          | 94.6         | 105.8         | 110.7         | 5                                 | 9                                 |
| caffeic acid hexoside   | 0.050 | 0.15 | 0.945          | 94.9         | 100.5         | 100.6         | 2                                 | 10                                |
| dihydroferulic acid     | 0.030 | 0.09 | 0.923          | 100.4        | 112.0         | 99.7          | 8                                 | 8                                 |
| kaempferol-3-dihexoside | 0.040 | 0.12 | 0.994          | 95.8         | 100.8         | 102.8         | 4                                 | 7                                 |
| sinapinic acid hexose   | 0.040 | 0.12 | 0.991          | 99.1         | 101.9         | 104.2         | 6                                 | 7                                 |
| feruloyl quinic acid    | 0.030 | 0.09 | 0.99           | 102.8        | 110.5         | 99.4          | 4                                 | 7                                 |
| caffeoyl quinic acid    | 0.030 | 0.09 | 0.991          | 111.9        | 100.8         | 99.7          | 5                                 | 9                                 |
| caffeic acid            | 0.060 | 0.18 | 0.998          | 99.7         | 99.1          | 100.8         | 6                                 | 7                                 |
| caffeoyl shikimate acid | 0.040 | 0.12 | 0.999          | 100.7        | 99.7          | 98.9          | 5                                 | 9                                 |
| hyperoside              | 0.030 | 0.09 | 0.991          | 111.9        | 110.8         | 106.5         | 8                                 | 8                                 |
| rutin                   | 0.050 | 0.15 | 0.999          | 100.3        | 99.7          | 100.9         | 6                                 | 7                                 |
| coumaroyl diglucoside   | 0.050 | 0.15 | 0.995          | 99.1         | 100.7         | 106.4         | 6                                 | 8                                 |
| ferulic acid            | 0.030 | 0.09 | 0.991          | 100.5        | 98.6          | 104.6         | 2                                 | 10                                |
| luteolin-7-O-glucoside  | 0.060 | 0.18 | 0.995          | 101.7        | 98.6          | 103.9         | 7                                 | 10                                |
| quercetin rhamnoside    | 0.050 | 0.15 | 0.995          | 99.7         | 101.6         | 102.9         | 3                                 | 7                                 |
| dicafeoyl quinic acid   | 0.040 | 0.12 | 0.999          | 101.6        | 100.7         | 99.6          | 8                                 | 7                                 |
| coumaric acid           | 0.04  | 0.12 | 0.999          | 115.9        | 101.8         | 102.7         | 8                                 | 4                                 |
